# Supplementary material
Source: PubMed Central journal article supplement (PMC5478956)
Supplement: IAI.00218-17_zii999092080s1.pdf [file IAI.00218-17_zii999092080s1.pdf]

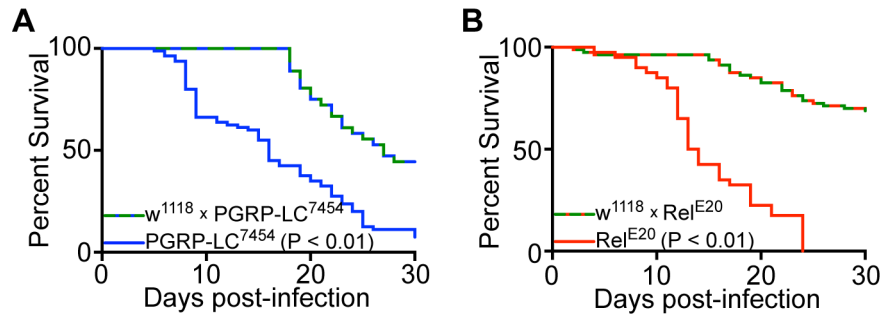

**Supplementary Figure 1. Partial rescue of PGRP-LC and Relish reduce the susceptibility to *C. burnetii* infection.** A) 4 day old  $PGRP-LC^{7454}$  adult males or adult male offspring from crosses between  $w^{1118}$  and  $PGRP-LC^{7454}$  were infected with *C. burnetii* (100 GE/fly), and percent survival was evaluated for a period of 30 days. B) 4 day old  $Rel^{E20}$  adult males or adult male offspring from crosses between  $w^{1118}$  and  $Rel^{E20}$  were infected with *C. burnetii* (100 GE/fly), and percent survival was evaluated for a period of 30 days.

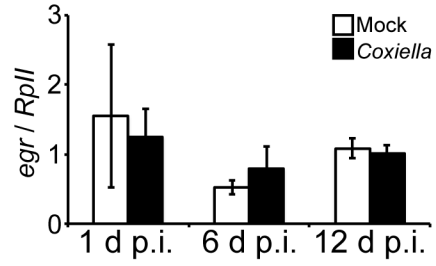

**Supplementary Figure 2. Eiger is not induced during *C. burnetii* infection.** 4 day old adult *w<sup>1118</sup>* male flies were mock-infected or infected with *C. burnetii* (100 GE/fly). Expression of *Eiger* was determined at 1, 6, and 12 days post-infection (d p.i.).
